# Supplementary material
Source: MDPI journal article supplement (https://www.mdpi.com/1999-4907/12/6/678)
Supplement: s1 [file s1]

**Table S1.** Oak species, collection sites and nursery sites.

| <b>Species</b>      | <b>Greece</b>                           | <b>Italy</b>                            | <b>Germany</b>                         |
|---------------------|-----------------------------------------|-----------------------------------------|----------------------------------------|
| <i>Q. pubescens</i> | 40°35'45"N,<br>23°45'22"E,<br>30 m asl  | 43°25'02"N,<br>10°52'25"E,<br>325 m asl | N/A                                    |
| <i>Q. frainetto</i> | 40°29'30"N,<br>23°37'51"E,<br>530 m asl | 41°18'02"N,<br>13°02'54"E,<br>25 m asl  | N/A                                    |
| <i>Q. ilex</i>      | 40°35'10"N,<br>23°47'44"E,<br>5 m asl   | 41°18'02"N,<br>13°02'54"E,<br>25 m asl  | N/A                                    |
| <i>Q. robur</i>     | N/A                                     | N/A                                     | „Oberrheingraben“                      |
| Nursery             | 40°35'60"N,<br>23°45'13"E,<br>25 m asl  | 43°20'18"N,<br>12°33'35"E,<br>450 m asl | 49°50'06"N,<br>08°34'23"E,<br>95 m asl |

**Table S2.** Average minimum and maximum monthly temperatures and total monthly precipitation recorded in the common gardens in the course of 2017, 2018 and 2019. Data in RIE, SWA were recorded on site, data in SAN at the climate station in Casteldilago, and data for OLY and STR close to the sites at the climate stations of Hellas Gold.

|                      | <b>Parameter</b> | <b>Jan</b> | <b>Feb</b> | <b>Mar</b> | <b>Apr</b> | <b>May</b> | <b>Jun</b> | <b>Jul</b> | <b>Aug</b> | <b>Sep</b> |
|----------------------|------------------|------------|------------|------------|------------|------------|------------|------------|------------|------------|
| <b>Germany - RIE</b> |                  |            |            |            |            |            |            |            |            |            |
| 2017                 | T min (°C)       | -3.8       | 1.6        | 4.0        | 3.6        | 9.5        | 13.1       | 14.6       | 13.7       | 9.4        |
|                      | T max (°C)       | 2.3        | 9.1        | 15.2       | 16.0       | 22.5       | 27.2       | 27.0       | 26.5       | 20.8       |
|                      | Precip. (mm)     | 37.2       | 31.2       | 72.0       | 17.2       | 111.4      | 69.4       | 119.8      | 125.4      | 97.2       |
| 2018                 | T min (°C)       | 3.4        | -3.3       | 0.5        | 7.6        | 10.8       | 14.3       | 15.6       | 14.9       | 9.7        |
|                      | T max (°C)       | 8.4        | 3.4        | 9.6        | 20.7       | 23.9       | 25.2       | 29.5       | 28.3       | 23.3       |
|                      | Precip. (mm)     | 110.6      | 21.4       | 51.4       | 63.8       | 50.2       | 109.6      | 21.2       | 28.6       | 44.4       |
| 2019                 | T min (°C)       | -0.7       | -0.3       | 3.0        | 5.8        | 7.4        | 13.6       | 14.8       | 14.6       | 10.0       |
|                      | T max (°C)       | 4.2        | 10.5       | 13.2       | 17.1       | 18.2       | 28.2       | 27.6       | 27.5       | 21.0       |
|                      | Precip. (mm)     | 56.2       | 31.2       | 70.0       | 36.8       | 59.0       | 37.2       | 21.0       | 50.0       | 70.6       |
| <b>Germany - SWA</b> |                  |            |            |            |            |            |            |            |            |            |
| 2017                 | T min (°C)       | -5.1       | 0.5        | 2.8        | 1.7        | 8.0        | 11.4       | 13.3       | 12.5       | 8.2        |
|                      | T max (°C)       | 1.5        | 8.9        | 15.1       | 17.2       | 24.0       | 29.5       | 28.6       | 27.9       | 21.4       |
|                      | Precip. (mm)     | 26.2       | 22.4       | 52.2       | 1.0        | 105.8      | 19.2       | 97.4       | 85.4       | 32.8       |
| 2018                 | T min (°C)       | 2.7        | -4.6       | -0.7       | 5.7        | 9.6        | 13.3       | 13.4       | 13.3       | 8.0        |
|                      | T max (°C)       | 7.9        | 2.9        | 9.9        | 23.3       | 27.2       | 29.2       | 33.5       | 31.9       | 25.5       |
|                      | Precip. (mm)     | 80.0       | 13.8       | 30.4       | 55.2       | 24.0       | 45.0       | 12.8       | 15.6       | 30.4       |
| 2019                 | T min (°C)       | -2.6       | -1.8       | 2.7        | 4.2        | 5.7        | 12.3       | 12.5       | 12.7       | 7.7        |
|                      | T max (°C)       | 2.8        | 9.9        | 13.3       | 18.6       | 20.1       | 30.5       | 30.1       | 29.7       | 21.9       |
|                      | Precip. (mm)     | 11.8       | 20.2       | 48.8       | 36.0       | 60.2       | 57.0       | 28.8       | 52.0       | 54.6       |
| <b>Italy - SAN</b>   |                  |            |            |            |            |            |            |            |            |            |
| 2017                 | T min (°C)       | -0.2       | 4.6        | 4.8        | 6.2        | 11.1       | 16.5       | 17.0       | 18.4       | 12.6       |
|                      | T max (°C)       | 10.2       | 16.0       | 19.8       | 22.3       | 27.3       | 33.9       | 35.5       | 36.9       | 26.0       |
|                      | Precip. (mm)     | 58.0       | 78.4       | 38.8       | 35.8       | 39.8       | 33.2       | 40.4       | 34.6       | 97.4       |
| 2018                 | T min (°C)       | 3.1        | 1.0        | 4.5        | 9.3        | 12.6       | 14.8       | 17.4       | 17.0       | 14.9       |
|                      | T max (°C)       | 13.9       | 10.9       | 14.9       | 24.2       | 25.0       | 29.2       | 33.7       | 32.9       | 29.8       |
|                      | Precip. (mm)     | 50.6       | 69.2       | 223.2      | 55.4       | 152.2      | 110.6      | 36.8       | 114.2      | 55.8       |
| 2019                 | T min (°C)       | -0.3       | 1.6        | 4.5        | 6.9        | 9.3        | 16.1       | 18.0       | 18.2       | 14.0       |
|                      | T max (°C)       | 10.1       | 15.6       | 19.6       | 21.3       | 20.4       | 33.6       | 35.0       | 35.7       | 29.0       |
|                      | Precip. (mm)     | 69.6       | 93.6       | 11.3       | 106.4      | 253.6      | 9.4        | 69.0       | 40.0       | 135.0      |

| <b>Greece - OLY</b> |              |       |       |       |      |      |       |       |      |      |
|---------------------|--------------|-------|-------|-------|------|------|-------|-------|------|------|
| 2017                | T min (°C)   | 0.2   | 6.0   | 8.3   | 9.1  | 14.1 | 18.7  | 20.3  | 20.7 | 17.1 |
|                     | T max (°C)   | 6.2   | 12.6  | 17.2  | 18.6 | 24.8 | 36.0  | 36.2  | 39.4 | 31.2 |
|                     | Precip. (mm) | 25.0  | 49.9  | 24.2  | 84.5 | 35.7 | 75.0  | 4.1   | 99.7 | 10.0 |
| 2018                | T min (°C)   | 3.3   | 5.3   | 7.0   | 11.1 | 15.6 | 18.4  | 20.1  | 20.1 | 17.0 |
|                     | T max (°C)   | 10.7  | 11.2  | 15.1  | 22.2 | 26.0 | 28.5  | 30.4  | 32.1 | 27.8 |
|                     | Precip. (mm) | 25.0  | 49.9  | 24.2  | 84.5 | 35.7 | 46.0  | 108.2 | 95.6 | 8.0  |
| 2019                | T min (°C)   | 2.2   | 4.0   | 6.2   | 9.1  | 12.9 | 18.8  | 19.5  | 20.9 | 17.3 |
|                     | T max (°C)   | 8.5   | 11.7  | 15.5  | 17.9 | 23.9 | 30.1  | 30.8  | 33.2 | 28.3 |
|                     | Precip. (mm) | 227.9 | 24.1  | 30.2  | 57.1 | 47.8 | 48.7  | 45.2  | 0    | 35.3 |
| <b>Greece - STR</b> |              |       |       |       |      |      |       |       |      |      |
| 2017                | T min (°C)   | -1.7  | 2.8   | 5.0   | 4.3  | 10.1 | 17.4  | 19.3  | 20.0 | 16.6 |
|                     | T max (°C)   | 2.9   | 7.9   | 11.7  | 13.7 | 20.6 | 35.8  | 35.2  | 41.4 | 30.6 |
|                     | Precip. (mm) | 145.1 | 52.2  | 64.3  | 16.2 | 53.9 | 40.3  | 103.0 | 2.6  | 33.8 |
| 2018                | T min (°C)   | 2.4   | 3.4   | 5.5   | 10.6 | 14.1 | 17.1  | 18.3  | 20.3 | 15.1 |
|                     | T max (°C)   | 8.8   | 7.4   | 12.2  | 21.1 | 23.5 | 25.7  | 27.9  | 28.1 | 24.6 |
|                     | Precip. (mm) | 24.0  | 207.0 | 116.5 | 3.8  | 36.3 | 189.6 | 41.0  | 2.5  | 29.8 |
| 2019                | T min (°C)   | 1.3   | 2.7   | 5.9   | 8.1  | 12.2 | 17.9  | 18.7  | 20.6 | 16.5 |
|                     | T max (°C)   | 5.5   | 9.1   | 14.8  | 15.3 | 20.5 | 27.2  | 28.3  | 30.1 | 25.1 |
|                     | Precip. (mm) | 227.6 | 10.0  | 32.6  | 40.9 | 44.0 | 18.1  | 49.7  | 0.7  | 49.6 |

**Table S3.** Statistical analysis of height (in cm) in the common gardens, measured in summer 2019. Values followed by different letters within a row are significantly different at  $P < 5\%$ , as calculated by Kruskal-Wallis one-way-ANOVA tests with Dunn's post-hoc test. Means of *Q. robur* were analyzed by t-test at  $P < 5\%$ .

| Species and provenance | Plantation site |                |                |                |                 |
|------------------------|-----------------|----------------|----------------|----------------|-----------------|
|                        | RIE             | SWA            | SAN            | OLY            | STR             |
| <i>Q. ilex</i> GR      | 50.21 ± 1.41 a  | 32.96 ± 1.07 b | 46.13 ± 1.49 a | 8.75 ± 0.92 c  | 15.33 ± 3.02 bc |
| <i>Q. ilex</i> IT      | 60.18 ± 2.20 a  | 49.01 ± 1.51 b | 59.47 ± 1.40 a | 15.50 ± 2.53 c | 13.17 ± 2.46 c  |
| <i>Q. frainetto</i> GR | 23.24 ± 0.78 a  | 23.52 ± 0.95 a | 23.43 ± 1.13 a | 8.50 ± 1.02 b  | 11.53 ± 0.66 b  |
| <i>Q. frainetto</i> IT | 29.33 ± 0.93 a  | 33.63 ± 1.39 a | 25.69 ± 1.38 b | 11.94 ± 2.05 c | 15.42 ± 1.36 c  |
| <i>Q. pubescens</i> GR | 39.74 ± 1.82 b  | 29.67 ± 1.13 c | 46.25 ± 1.72 a | 12.87 ± 0.80 e | 21.39 ± 1.28 d  |
| <i>Q. pubescens</i> IT | 62.50 ± 2.31 a  | 36.32 ± 1.28 b | 71.27 ± 2.42 a | 13.81 ± 1.11 c | 20.71 ± 1.32 c  |
| <i>Q. robur</i> DE     | 50.41 ± 1.49 a  | 39.39 ± 1.22 b |                |                |                 |

**Table S4.** Statistical analysis of root collar diameter (mm) in the common gardens, measured in summer 2016, to examine the parameters potential as indicator of second-year survival after outplanting. Values followed by different letters within a row are significantly different at  $P < 5\%$ , as calculated by t-tests.

| Species              | Species and provenance |                   |                        |                        |                        |                        |
|----------------------|------------------------|-------------------|------------------------|------------------------|------------------------|------------------------|
|                      | <i>Q. ilex</i> GR      | <i>Q. ilex</i> IT | <i>Q. frainetto</i> GR | <i>Q. frainetto</i> IT | <i>Q. pubescens</i> GR | <i>Q. pubescens</i> IT |
| <b>Germany - RIE</b> |                        |                   |                        |                        |                        |                        |
| Survived             | 11.74 ± 0.19 a         | 12.03 ± 0.18      | 6.48 ± 0.19 a          | 9.09 ± 0.20 a          | 15.04 ± 0.33 a         | 17.54 ± 0.30 a         |
| Perished             | 9.75 ± 1.49 a          | -                 | 3.80 ± 0.37 b          | 5.75 ± 0.25 b          | 13.20 ± 0.80 a         | 11.75 ± 1.11 b         |
| <b>Germany - SWA</b> |                        |                   |                        |                        |                        |                        |
| Survived             | 11.67 ± 0.21 a         | 12.48 ± 0.24 a    | 6.78 ± 0.22 a          | 9.21 ± 0.24 a          | 15.14 ± 0.39 a         | 17.33 ± 0.30 a         |
| Perished             | 11.90 ± 0.53 a         | 12.50 ± 0.51 a    | 7.49 ± 0.29 a          | 8.64 ± 0.32 a          | 15.10 ± 0.74 a         | 17.61 ± 1.12 a         |
| <b>Greece - OLY</b>  |                        |                   |                        |                        |                        |                        |
| Survived             | 10.75 ± 1.55 a         | 18.00 ± 1.73 a    | 6.65 ± 0.64 a          | 9.59 ± 1.03 a          | 20.17 ± 0.96 a         | 16.87 ± 0.59 a         |
| Perished             | 11.09 ± 0.34 a         | 17.50 ± 0.35 a    | 6.69 ± 0.17 a          | 7.54 ± 0.31 b          | 19.15 ± 0.48 a         | 17.09 ± 0.41 a         |
| <b>Greece - STR</b>  |                        |                   |                        |                        |                        |                        |
| Survived             | 9.67 ± 0.61 a          | 14.00 ± 1.22 a    | 6.24 ± 0.30 a          | 6.81 ± 0.37 a          | 19.33 ± 0.51 a         | 17.97 ± 0.56 a         |
| Perished             | 9.88 ± 0.26 a          | 13.67 ± 0.28 a    | 6.72 ± 0.22 a          | 7.77 ± 0.32 a          | 20.81 ± 0.62 a         | 18.08 ± 0.40 a         |

**Table S5.** Mean values of fitness indicators (FI) of the plants in 2016, separated into those who established live in 2017 and those who perished in the first year after plantation (dead in 2017).

| Species and provenance / country of plantation | live in 2017 |        | dead in 2017 |        | signif. diff. |
|------------------------------------------------|--------------|--------|--------------|--------|---------------|
|                                                | FI (mean)    | SE     | FI (mean)    | SE     |               |
| <i>Q. ilex</i> GR / GE                         | 0,5964       | 0,0035 | 0,5666       | 0,0141 | no            |
| <i>Q. ilex</i> IT / GE                         | 0,5697       | 0,0031 | 0,5638       | 0,0129 | no            |
| <i>Q. frainetto</i> GR / GE                    | 0,5684       | 0,0037 | 0,5521       | 0,0089 | no            |
| <i>Q. frainetto</i> IT / GE                    | 0,5675       | 0,0034 | 0,5801       | 0,0087 | no            |
| <i>Q. pubescens</i> GR / GE                    | 0,5688       | 0,0038 | 0,5763       | 0,0098 | no            |
| <i>Q. pubescens</i> IT / GE                    | 0,5960       | 0,0028 | 0,5904       | 0,0106 | no            |
| <i>Q. ilex</i> GR / GR                         | 0,3551       | 0,0185 | 0,3298       | 0,0038 | no            |
| <i>Q. ilex</i> IT / GR                         | 0,3787       | 0,0229 | 0,3971       | 0,0036 | no            |
| <i>Q. frainetto</i> GR / GR                    | 0,3541       | 0,0152 | 0,3425       | 0,0045 | no            |
| <i>Q. frainetto</i> IT / GR                    | 0,3473       | 0,0131 | 0,3582       | 0,0061 | no            |

|                             |        |        |        |        |    |
|-----------------------------|--------|--------|--------|--------|----|
| <i>Q. pubescens</i> GR / GR | 0,4374 | 0,0055 | 0,4348 | 0,0042 | no |
| <i>Q. pubescens</i> IT / GR | 0,4577 | 0,0063 | 0,4569 | 0,0039 | no |

**Table S6.** Spearman correlation analyses between Relative Population Fitness (RPF) ranking positions in 2019 vs. 2016 at the German sites. RPF were calculated as described in Materials and methods. Pearson's r value was also calculated for the height data in 2019 vs. 2016 at the German and Greek sites. Significance values for the correlations are given at P< 5% (\*), 1% (\*\*), 0,1% (\*\*\*)

|       | RIE+SWA               |                      |     | OLY+STR              |     |
|-------|-----------------------|----------------------|-----|----------------------|-----|
|       | Spearman's r for RPF  | Pearson r for height | n   | Pearson r for height | n   |
| IlxGR | 0.051 <sup>ns</sup>   | 0.131 <sup>*</sup>   | 373 | -0.188 <sup>ns</sup> | 17  |
| IlxIT | -0.023 <sup>ns</sup>  | 0.031 <sup>ns</sup>  | 370 | -0.284 <sup>ns</sup> | 18  |
| FraGR | -0.203 <sup>***</sup> | -0.077 <sup>ns</sup> | 357 | -0.137 <sup>ns</sup> | 46  |
| FraIT | -0.204 <sup>***</sup> | -0.025 <sup>ns</sup> | 357 | -0.014 <sup>ns</sup> | 39  |
| PubGR | 0.109 <sup>*</sup>    | 0.054 <sup>ns</sup>  | 368 | -0.075 <sup>ns</sup> | 145 |
| PubIT | -0.168 <sup>**</sup>  | -0.044 <sup>ns</sup> | 386 | 0.173 <sup>ns</sup>  | 80  |
